# Supplementary material
Source: Springer Nature journal article supplement (https://www.springermedizin.de/resource/supplementary/13048_2011_66_MOESM2_ESM.pdf/9664862)

**WT*****ob/ob******db/db***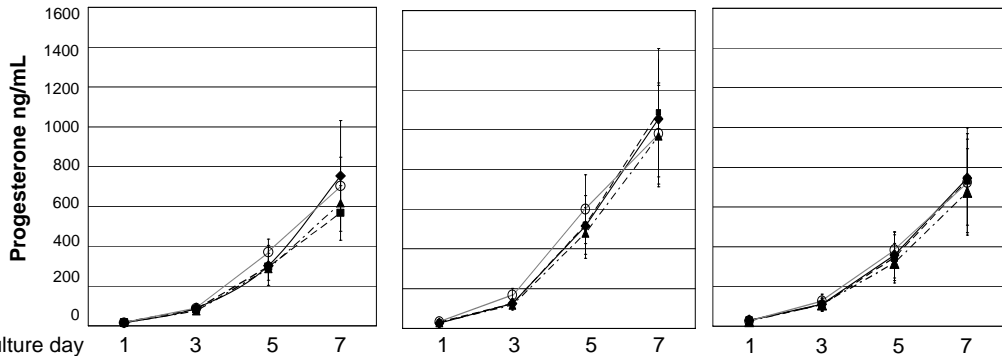

—◆— 0    - - ■ - - 10    -▲- - - 400    ...⊙... 1000

**Metformin concentration, micromolar (μM)**

Supplement: MOESM2 [file 9664862]
